# Supplementary material
Source: Royal Society of Chemistry journal article supplement (doi:10.1039/d5va00367a)
Supplement: d5va00367a1.pdf [file d5va00367a1.pdf]

Supplementary information for

## Spatiotemporal Analysis of Long-term Air Pollution in Two Urban Regions of Vietnam and Potential Source Contributions

Table S1. List of industrial parks in Northern Vietnam

| No | Name (abbr)        | Lat    | Lon     | S (ha) | Active year | Filling rate |
|----|--------------------|--------|---------|--------|-------------|--------------|
| 1  | BG_Dinh-Tram       | 21.243 | 106.142 | 127.4  | 2003        | 100%         |
| 2  | BG_Song-Khe-NH     | 21.245 | 106.177 | 158.7  | 2005        | 95%          |
| 3  | BG_Quang-Chau      | 21.224 | 106.115 | 426    | 2006        | 90%          |
| 4  | BG_Van-Trung       | 21.244 | 106.134 | 350.3  | 2007        | 85%          |
| 5  | BG_Viet-Han        | 21.255 | 106.144 | 197.3  | 2010        | 70%          |
| 6  | BG_Hoa-Phu         | 21.239 | 105.965 | 207.4  | 2011        | 65%          |
| 7  | BG_Tan-Hung        | 21.349 | 106.293 | 105.3  | 2012        | 60%          |
| 8  | BG_Chau-Minh-BL-HL | 21.271 | 105.962 | 105.5  | 2024        | 0%           |
| 9  | BG_Yen-Lu          | 21.193 | 106.193 | 377    | 2021        | 5%           |
| 10 | BK_Thanh-Binh      | 21.934 | 105.804 | 153.8  | 2007        | 50%          |
| 11 | HNa_Dong-VanI      | 20.667 | 105.928 | 138    | 2002        | 100%         |
| 12 | HNa_Dong-VanII     | 20.659 | 105.930 | 263.82 | 2006        | 97%          |
| 13 | HNa_Dong-VanIII    | 20.635 | 105.932 | 523    | 2019        | Updating     |
| 14 | HNa_Dong-VanIV     | 20.634 | 105.886 | 300    | 2016        | Updating     |
| 15 | HNa_Hoa-Mac        | 20.649 | 106.000 | 131    | 2008        | >90%         |
| 16 | HNa_Chau-Son       | 20.522 | 105.894 | 376.9  | 2010        | >85%         |
| 17 | HNa_Kim-BangI      | 20.628 | 105.852 | 230    | 2023        | 10%          |
| 18 | HNa_Thai-Ha        | 20.586 | 106.104 | 133    | 2016        | ~70%         |
| 19 | HNa_Hoang-Dong     | 20.629 | 105.925 | 100    | 2005        | Updating     |
| 20 | HNo_Noi-Bai        | 21.232 | 105.814 | 114    | 1994        | 100%         |
| 21 | HNo_Thach-That     | 21.010 | 105.634 | 150.78 | 2007        | 100%         |

| <b>No</b> | <b>Name (abrre)</b>       | <b>Lat</b> | <b>Lon</b> | <b>S (ha)</b> | <b>Active year</b> | <b>Filling rate</b> |
|-----------|---------------------------|------------|------------|---------------|--------------------|---------------------|
| 22        | <b>HNo_Thang-Long</b>     | 21.116     | 105.780    | 302           | 1997               | 100%                |
| 23        | <b>HNo_Phu-Nghia</b>      | 20.929     | 105.671    | 170.1         | 2007               | 100%                |
| 24        | <b>HNo_Sai-DongB</b>      | 21.029     | 105.903    | 97.11         | 1996               | 100%                |
| 25        | <b>HNo_Sach-Soc-Son</b>   | 21.240     | 105.833    | 303           | 2021               | 50%                 |
| 26        | <b>HNo_HANSSIP</b>        | 20.709     | 105.915    | 640           | 2023               | 100%                |
| 27        | <b>HNo_Dai-Tu</b>         | 21.032     | 105.924    | 40            | 1995               | 100%                |
| 28        | <b>HNo_Nam-Thang-Long</b> | 21.081     | 105.763    | 260.87        | 1999               | 100%                |
| 29        | <b>HNo_Quang-Minh</b>     | 21.193     | 105.766    | 344.4         | 2004               | 100%                |
| 30        | <b>HD_Nam-Sach</b>        | 20.967     | 106.372    | 63            | 2003               | 100%                |
| 31        | <b>HD_Dai-An</b>          | 20.928     | 106.258    | 136           | 2003               | 88%                 |
| 32        | <b>HD_Phuc-Dien</b>       | 20.929     | 106.193    | 170           | 2003               | 100%                |
| 33        | <b>HD_Tan-Truong</b>      | 20.930     | 106.227    | 198           | 2005               | 94%                 |
| 34        | <b>HD_Dai-An-MR</b>       | 20.929     | 106.272    | 416           | 2007               | 74%                 |
| 35        | <b>HD_KTC-An-Phat</b>     | 20.939     | 106.288    | 46.4          | 2019               | 61%                 |
| 36        | <b>HD_Lai-Vu</b>          | 20.982     | 106.394    | 212.9         | 2007               | 89%                 |
| 37        | <b>HD_Lai-Cach</b>        | 20.936     | 106.265    | 134.55        | 2008               | 40%                 |
| 38        | <b>HD_Cong-Hoa</b>        | 21.124     | 106.418    | 700           | 2007               | Updating            |
| 39        | <b>HD_Phu-Thai</b>        | 20.967     | 106.519    | 56.7          | 2021               | 98%                 |
| 40        | <b>HD_CD-LD-VSIP</b>      | 20.933     | 106.171    | 183.96        | 2008               | Updating            |
| 41        | <b>HP_Deep-CI</b>         | 20.842     | 106.764    | 541           | 1997               | 100%                |
| 42        | <b>HP_Deep-CII</b>        | 20.799     | 106.793    | 377           | 2016               | 85%                 |
| 43        | <b>HP_Deep-CIII</b>       | 20.819     | 106.784    | 502           | 2018               | 60%                 |
| 44        | <b>HP_VSIP</b>            | 20.909     | 106.701    | 1.6           | 2010               | 90%                 |
| 45        | <b>HP_Trang-Due</b>       | 20.861     | 106.567    | 600+          | 2011               | 95%                 |
| 46        | <b>HP_An-Duong</b>        | 20.869     | 106.584    | 196           | 2008               | 90%                 |
| 47        | <b>HP_Nomura</b>          | 20.902     | 106.593    | 153           | 1994               | 100%                |
| 48        | <b>HP_Nam-Dinh-Vu</b>     | 20.816     | 106.812    | 160           | 2008               | 75%                 |
| 49        | <b>HP_MP-Dinh-Vu</b>      | 20.826     | 106.771    | 260           | 2021               | 30%                 |
| 51        | <b>HP_Deep-CIV</b>        | 20.868     | 106.706    | 200           | 2021               | Updating            |

| No | Name (abbr)        | Lat    | Lon     | S (ha) | Active year | Filling rate |
|----|--------------------|--------|---------|--------|-------------|--------------|
| 52 | HP_Ben-Rung        | 20.909 | 106.723 | 200    | 2021        | Updating     |
| 53 | HP_Cau-Cuu         | 20.791 | 106.518 | 264    | 2020        | 80%          |
| 54 | HP_Nam-Cau-Kieu    | 20.910 | 106.634 | 263    | 2008        | 75%          |
| 55 | HB_Luong-Son       | 20.885 | 105.546 | 68,5   | 2005        | ~95%         |
| 56 | HB_Yen-Quang       | 20.987 | 105.414 | 200    | 2021        | ~40%         |
| 58 | HB_Mong-Hoa        | 20.902 | 105.414 | 230    | 2000        | ~50%         |
| 60 | HB_Thanh-Ha        | 20.585 | 105.683 | 140    | 2011        | 50%          |
| 61 | HY_Pho-Noi         | 20.954 | 106.027 | 688.94 | 2003        | 100%         |
| 62 | HY_Thang-LongII    | 20.918 | 106.069 | 525.7  | 2006        | 70%          |
| 63 | HY_Det-may-Pho-Noi | 20.927 | 106.065 | 121.81 | 2005        | 100%         |
| 64 | HY_Yen-My          | 20.896 | 106.059 | 280    | 2008        | 100%         |
| 65 | HY_Yen-MyII        | 20.877 | 106.044 | 313.5  | 2010        | 100%         |
| 67 | HY_Minh-Duc        | 20.915 | 106.123 | 198    | 2007        | 100%         |
| 68 | HY_Minh-Quang      | 20.921 | 106.116 | 150    | 2008        | 100%         |
| 69 | HY_CNS             | 20.827 | 106.044 | 143.08 | 2021        | 14%          |
| 70 | HY_So3             | 20.838 | 106.047 | 159.71 | 2021        | 50%          |
| 71 | LS_Dong-Banh       | 21.568 | 106.494 | 162,13 | 2021        | 50%%         |
| 72 | LS_Huu-Lung        | 21.493 | 106.365 | 560    | 2025        | 2%%          |
| 73 | LS_Na-Duong        | 21.699 | 106.976 | 270    | 2021        | 60%          |
| 74 | PT_Thuy-Van        | 21.340 | 105.344 | 335    | 2005        | ~95%         |
| 75 | PT_Trung-Ha        | 21.233 | 105.339 | 100    | 2006        | ~90%         |
| 76 | PT_Phu-Ninh        | 21.379 | 105.339 | 100    | 2008        | ~85%         |
| 79 | QN_Dong-Mai        | 21.004 | 106.835 | 160    | 2014        | ~90%         |
| 80 | QN_Song-Khoai      | 20.981 | 106.807 | 714    | 2021        | ~45%         |
| 81 | QN_Viet-Hung       | 21.008 | 106.995 | 301    | 2007        | 80%          |
| 82 | QN_Dam-Nha-Mac     | 20.889 | 106.821 | 4988   | 2014        | 90%          |
| 83 | QN_Bac-Tien-Phong  | 20.895 | 106.829 | 5789   | 2018        | Updating     |
| 84 | TB_Gia-Le          | 20.504 | 106.358 | 42     | 2004        | ~90%         |
| 86 | TB_Lien-Ha-Thai    | 20.551 | 106.537 | 588.84 | 2022        | ~30%         |
| 87 | TB_Thaco           | 20.646 | 106.425 | 194.36 | 2025        | 0%           |
| 88 | TB_VSIP            | 20.614 | 106.615 | 344    | 2024        | 5%           |

| No | Name (abbr)     | Lat    | Lon     | S (ha) | Active year | Filling rate |
|----|-----------------|--------|---------|--------|-------------|--------------|
| 89 | TN_Yen-Binh     | 21.429 | 105.895 | 400    | 2014        | ~100%        |
| 90 | TN_Song-CongI   | 21.481 | 105.862 | 195    | 2005        | ~95%         |
| 91 | TN_Song-CongII  | 21.506 | 105.844 | 250    | 2018        | ~80%         |
| 92 | TN_Nam-Pho-Yen  | 21.354 | 105.875 | 120    | 2016        | >90%         |
| 93 | TN_Diem-Thuy    | 21.468 | 105.892 | 350    | 2012        | ~85%         |
| 94 | TN_Quyet-Thang  | 21.577 | 105.793 | 160    | 2006        | ~75%         |
| 95 | TQ_Long-Binh-An | 21.737 | 105.245 | 100    | 2007        | 90%          |
| 96 | TQ_Son-Nam      | 21.529 | 105.481 | 150    | 2014        | 50%          |

Information compiled from various sources

<https://bqlkcن.bacgiang.gov.vn/>

<https://izahanam.gov.vn/cac-khu-cong-nghiep-ha-nam>

<https://www.redsunland.vn/>

[https://hiza.hanoi.gov.vn/thong-tin-du-lieu/-/view\\_content/5669775-tong-hop-csdl-moi-truong-khu-cong-nghiep.html](https://hiza.hanoi.gov.vn/thong-tin-du-lieu/-/view_content/5669775-tong-hop-csdl-moi-truong-khu-cong-nghiep.html)

<https://web01.haiduong.gov.vn/Trang/ChiTietTinTuc.aspx?nid=13053>

<https://als.com.vn/danh-sach-cac-khu-cong-nghiep-o-hai-duong>

<https://haiphong.gov.vn/cac-so-ban-nganh/ban-quan-ly-khu-kinh-te-hai-phong-629878>

<https://heza.gov.vn>

<https://ips.hoabinh.gov.vn>

<https://banqlkcن.hungyen.gov.vn/danh-muc-cac-kcn-da-duoc-quy-hoach-tren-dia-ban-tinh-hung-yen-c2611.html>

<http://bqlkcن.phutho.gov.vn>

<https://www.qeza.gov.vn/dskcn/vi/>

<https://bqlkktkcن.thaibinh.gov.vn/>

[https://bqlkktkcن.thaibinh.gov.vn/upload/80597/20171027/d0d18c899d6d2b480402be729bba30e781-bc-bqlkcن\\_sign.pdf](https://bqlkktkcن.thaibinh.gov.vn/upload/80597/20171027/d0d18c899d6d2b480402be729bba30e781-bc-bqlkcن_sign.pdf)

<https://bqlkcن.thainguyen.gov.vn/cac-khu-cong-nghiep>

<https://bqlkcن.tuyenquang.gov.vn/>

**Table S2.** List of industrial parks in Southern Vietnam

| <b>No</b> | <b>Name (abbr)</b> | <b>Lat</b> | <b>Lon</b> | <b>S (ha)</b> | <b>Active year</b> | <b>Filling rate</b> |
|-----------|--------------------|------------|------------|---------------|--------------------|---------------------|
| 1         | HCM_Dong-Nam       | 10.966     | 106.623    | 342           | 2008               | 90%                 |
| 2         | HCM_Vinh-Loc       | 10.822     | 106.592    | 207           | 1997               | 95%                 |
| 3         | HCM_Vinh-Loc3      | 10.828     | 106.591    | 210           | 2010               | 60%                 |
| 4         | HCM_Tan-Binh       | 10.808     | 106.611    | 178           | 1997               | 100%                |
| 5         | HCM_Tan-Tao        | 10.734     | 106.586    | 343.9         | 1996               | 97%                 |
| 6         | HCM_Tan-Phu-Trung  | 10.921     | 106.544    | 542           | 2003               | 100%                |
| 7         | HCM_An-Ha          | 10.820     | 106.515    | 159           | 2008               | 70%                 |
| 8         | HCM_Hiep-Phuoc     | 10.631     | 106.756    | 1686          | 1996               | 85%                 |
| 9         | HCM_Tan-Thoi-Hiep  | 10.882     | 106.637    | 200           | 1999               | 100%                |
| 10        | HCM_Tay-Bac-Cu-Chi | 10.983     | 106.485    | 208           | 1997               | 96%                 |
| 11        | HCM_Le-Minh-Xuan   | 10.742     | 106.543    | 700           | 1997               | 100%                |
| 12        | HCM_Le-Minh-XuanII | 10.756     | 106.556    | 319           | 2012               | 70%                 |
| 13        | HCM_Linh-TrungI    | 10.868     | 106.768    | 62            | 1995               | 100%                |
| 14        | HCM_Linh-TrungII   | 10.889     | 106.721    | 62.5          | 2000               | 100%                |
| 15        | HCM_Binh-Chieu     | 10.884     | 106.733    | 27.3          | 2000               | 90%                 |
| 16        | HCM_Tan-Thuan      | 10.756     | 106.738    | 300           | 1991               | 60%                 |
| 17        | HCM_Phong-Phu      | 10.697     | 106.633    | 148           | 2010               | 70%                 |
| 18        | HCM_Cat-LaiII      | 10.763     | 106.778    | 137           | 2003               | 100%                |
| 19        | HCM_Cong-nghe-cao  | 10.827     | 106.798    | 913           | 2002               | 99%                 |
| 20        | LA_Cau-Tram        | 10.631     | 106.591    | 77,82         | 2008               | 100%                |
| 21        | LA_Long-Hau        | 10.635     | 106.718    | 136,11        | 2006               | 95%                 |
| 22        | LA_Tan-Duc         | 10.788     | 106.478    | 545,69        | 2005               | 100%                |
| 23        | LA_Xuyen-A         | 10.882     | 106.522    | 302,45        | 2004               | 85%                 |
| 24        | LA_Phuc-Long       | 10.625     | 106.512    | 78,96         | 2003               | 100%                |
| 25        | LA_Vinh-Loc-2      | 10.641     | 106.518    | 561,5         | 2007               | 80%                 |
| 26        | LA_Nhut-Chanh      | 10.620     | 106.478    | 122,75        | 2006               | 90%                 |
| 27        | LA_Thinh-Phat      | 10.756     | 106.434    | 74            | 2005               | 100%                |
| 28        | LA_Tan-Kim         | 10.637     | 106.664    | 104,1         | 2005               | 85%                 |
| 29        | LA_Dong-Nam-A      | 10.642     | 106.659    | 605           | 2016               | Updating            |
| 30        | LA_Duc-Hoai-HP     | 10.796     | 106.501    | 204,2         | 2003               | 95%                 |

| <b>No</b> | <b>Name (abbr)</b>     | <b>Lat</b> | <b>Lon</b> | <b>S (ha)</b> | <b>Active year</b> | <b>Filling rate</b> |
|-----------|------------------------|------------|------------|---------------|--------------------|---------------------|
| 31        | LA_Thuan-Dao           | 10.621     | 106.493    | 300           | 2003-2012          | 100%                |
| 32        | LA_Cau-Cang-Phuoc-Dong | 10.488     | 106.644    | 83,2          | 2007               | 85%                 |
| 33        | LA_Thai-Hoa            | 10.924     | 106.473    | 100,27        | 2008               | 80%                 |
| 34        | LA_Duc-HoaIII-Anh-Hong | 10.932     | 106.450    | 44,87         | 2009               | 75%                 |
| 35        | LA_Duc-HoaIII-SLICO    | 10.931     | 106.461    | 295,66        | 2011               | 65%                 |
| 36        | LA_An-Nhut-Tan         | 10.573     | 106.510    | 120           | 2012               | 60%                 |
| 37        | LA_Tan-Do              | 10.799     | 106.491    | 209,1         | 2013               | 85%                 |
| 38        | LA_Phu-An-Thanh        | 10.682     | 106.457    | 352,57        | 2014               | 75%                 |
| 39        | LA_Hai-Son             | 10.800     | 106.481    | 338           | 2015               | 80%                 |
| 40        | LA_DNN-Tan-Phu         | 10.900     | 106.350    | 262           | 2016               | 70%                 |
| 41        | LA_Nam-Thuan           | 10.838     | 106.505    | 341,42        | 2017               | 65%                 |
| 42        | LA_Viet-Phat           | 10.722     | 106.323    | 1.213,7       | 2018               | 60%                 |
| 43        | LA_Huu-Thanh           | 10.779     | 106.449    | 524           | 2019               | 10%                 |
| 44        | DNa_Amata              | 10.942     | 106.892    | 513           | 1994               | 91%                 |
| 45        | DNa_Bien-HoaI          | 10.916     | 106.867    | 335           | 2000               | 100%                |
| 46        | DNa_Bien-HoaII         | 10.926     | 106.875    | 395           | 1995               | 100%                |
| 47        | DNa_Long-Binh          | 10.939     | 106.891    | 43.26         | 2007               | 100%                |
| 48        | DNa_Loteco             | 10.929     | 106.888    | 100           | 1996               | 100%                |
| 49        | DNa_Tam-Phuoc          | 10.867     | 106.941    | 323           | 2003               | 100%                |
| 50        | DNa_Long-Thanh         | 10.828     | 106.932    | 487           | 2003               | 49%                 |
| 51        | DNa_An-Phuoc           | 10.849     | 106.959    | 201           | 2012               | 97%                 |
| 52        | DNa_Go-Dau             | 10.639     | 107.036    | 182           | 2004               | 100%                |
| 53        | DNa_Nhon-TrachI        | 10.741     | 106.926    | 448           | 1997               | 100%                |
| 54        | DNa_Nhon-TrachII       | 10.725     | 106.924    | 331           | 1997               | 100%                |
| 55        | DNa_Nhon-TrachIII      | 10.710     | 106.943    | 1035          | 1997               | 95%                 |
| 56        | DNa_Nhon-TrachV        | 10.706     | 106.923    | 298           | 2003               | 100%                |
| 57        | DNa_Nhon-TrachVI       | 10.699     | 106.946    | 314           | 2004               | 100%                |
| 58        | DNa_Nhon-Trach-LK      | 10.717     | 106.920    | 108           | 2006               | 85%                 |
| 59        | DNa_Nhon-Trach-NP      | 10.721     | 106.913    | 183           | 2005               | 100%                |

| <b>No</b> | <b>Name (abbr)</b>     | <b>Lat</b> | <b>Lon</b> | <b>S (ha)</b> | <b>Active year</b> | <b>Filling rate</b> |
|-----------|------------------------|------------|------------|---------------|--------------------|---------------------|
| 60        | DNa_Song-May           | 10.981     | 106.954    | 473           | 1998               | 90%                 |
| 61        | DNa_Bau-Xeo            | 10.957     | 107.026    | 500           | 2006               | 98%                 |
| 62        | DNa_Giang-Dien         | 10.903     | 106.989    | 529           | 2008               | 70%                 |
| 63        | DNa_Ong-Keo            | 10.639     | 106.837    | 823           | 2008               | 90%                 |
| 64        | DNa_Ho-Nai             | 10.950     | 106.939    | 497           | 2000               | 41%                 |
| 65        | DNa_Tam-An             | 10.826     | 106.914    | 201           | 2010               | 80%                 |
| 66        | DNa_Phuoc-Binh         | 10.686     | 107.101    | 190           | 2012               | 90%                 |
| 67        | DNa_Long-Duc           | 10.845     | 106.983    | 300           | 2009               | 90%                 |
| 68        | DNa_Cam-My             | 10.771     | 107.178    | 150           | 2017               | 80%                 |
| 69        | DNa_Det-may-Nhon-Trach | 10.699     | 106.931    | 176           | 2003               | 97%                 |
| 70        | DNa_Long-Khanh         | 10.964     | 107.233    | 264           | 2008               | 91%                 |
| 71        | BD_VSIPI               | 10.931     | 106.719    | 500           | 1996               | 100%                |
| 72        | BD_Viet-HuongI         | 10.944     | 106.712    | 36            | 1996               | 100%                |
| 73        | BD_Dong-AnI            | 10.900     | 106.729    | 138           | 1997               | 100%                |
| 74        | BD_Song-ThanI          | 10.889     | 106.748    | 178           | 1995               | 100%                |
| 75        | BD_Song-ThanII         | 10.918     | 106.743    | 279           | 1996               | 100%                |
| 76        | BD_Tan-Dong-HiepB      | 10.925     | 106.784    | 52.8          | 2000               | 100%                |
| 77        | BD_Tan-Dong-HiepA      | 10.911     | 106.777    | 169           | 2001               | 85%                 |
| 78        | BD_Det-may-Binh-An     | 10.894     | 106.820    | 26            | 2003               | 96%                 |
| 79        | BD_Binh-Duong          | 10.870     | 106.755    | 17            | 2003               | 96%                 |
| 80        | BRVT_Phu-MyI           | 10.591     | 107.039    | 945           | 1998               | 95%                 |
| 81        | BRVT_My-XuanA          | 10.645     | 107.032    | 300           | 2002               | 100%                |
| 82        | BRVT_My-XuanA2         | 10.632     | 107.040    | 422           | 2003               | 96%                 |
| 83        | BRVT_Dong-Xuyen        | 10.404     | 107.111    | 161           | 1996               | 100%                |
| 84        | BRVT_My-XuanB1-Conac   | 10.636     | 107.066    | 227           | 2012               | 98%                 |
| 85        | BRVT_My-XuanB1-TH      | 10.649     | 107.073    | 200           | 2006               | 70%                 |
| 86        | BRVT_My-XuanB1-DD      | 10.646     | 107.062    | 146           | 2006               | 45%                 |
| 87        | BRVT_Cai-Mep           | 10.555     | 107.045    | 670           | 2002               | 70%                 |
| 88        | BRVT_Chau-Duc          | 10.591     | 107.170    | 1556          | 2008               | 40%                 |
| 89        | BRVT_Da-Bac            | 10.578     | 107.285    | 295           | 2015               | 95%                 |

| <b>No</b> | <b>Name (abbr)</b>      | <b>Lat</b> | <b>Lon</b> | <b>S (ha)</b> | <b>Active year</b> | <b>Filling rate</b> |
|-----------|-------------------------|------------|------------|---------------|--------------------|---------------------|
| 90        | BRVT_Dat-Do             | 10.518     | 107.307    | 496           | 2009               | 60%                 |
| 91        | BRVT_Long-Son           | 10.463     | 107.057    | 850           | 2008               | 60%                 |
| 92        | BRVT_Phú-MyIII          | 10.530     | 107.064    | 1050          | 2007               | 60%                 |
| 93        | BRVT_Phú-MyII           | 10.573     | 107.043    | 621           | 2006               | 77%                 |
| 94        | BT_Giao-Long            | 10.300     | 106.399    | 101           | 2006               | 100%                |
| 95        | BT_An-Hiep              | 10.270     | 106.284    | 68.5          | 2007               | 100%                |
| 96        | BT_Giao-LongII          | 10.294     | 106.414    | 67            | 2012               | 100%                |
| 97        | TG_My-Tho               | 10.359     | 106.361    | 79.14         | 1997               | 100%                |
| 98        | TG_Tan-Huong            | 10.485     | 106.359    | 197.02        | 2006               | 100%                |
| 99        | TG_Long-Giang           | 10.467     | 106.314    | 540           | 2007               | 83%                 |
| 100       | TG_Dau-khi-<br>Soai-Rap | 10.422     | 106.761    | 285.38        | 2021               | 13%                 |

Information compiled from various sources

<https://hepza.hochiminhcity.gov.vn>

<https://teamkcn.com/danh-sach-khu-cong-nghiep-o-tinh-long-an-d456779/>

<https://www.minhhungsikico.vn/vi/blog/danh-sach-khu-cong-nghiep-binh-duong-91.html>

<https://ittpa.baria-vungtau.gov.vn/>

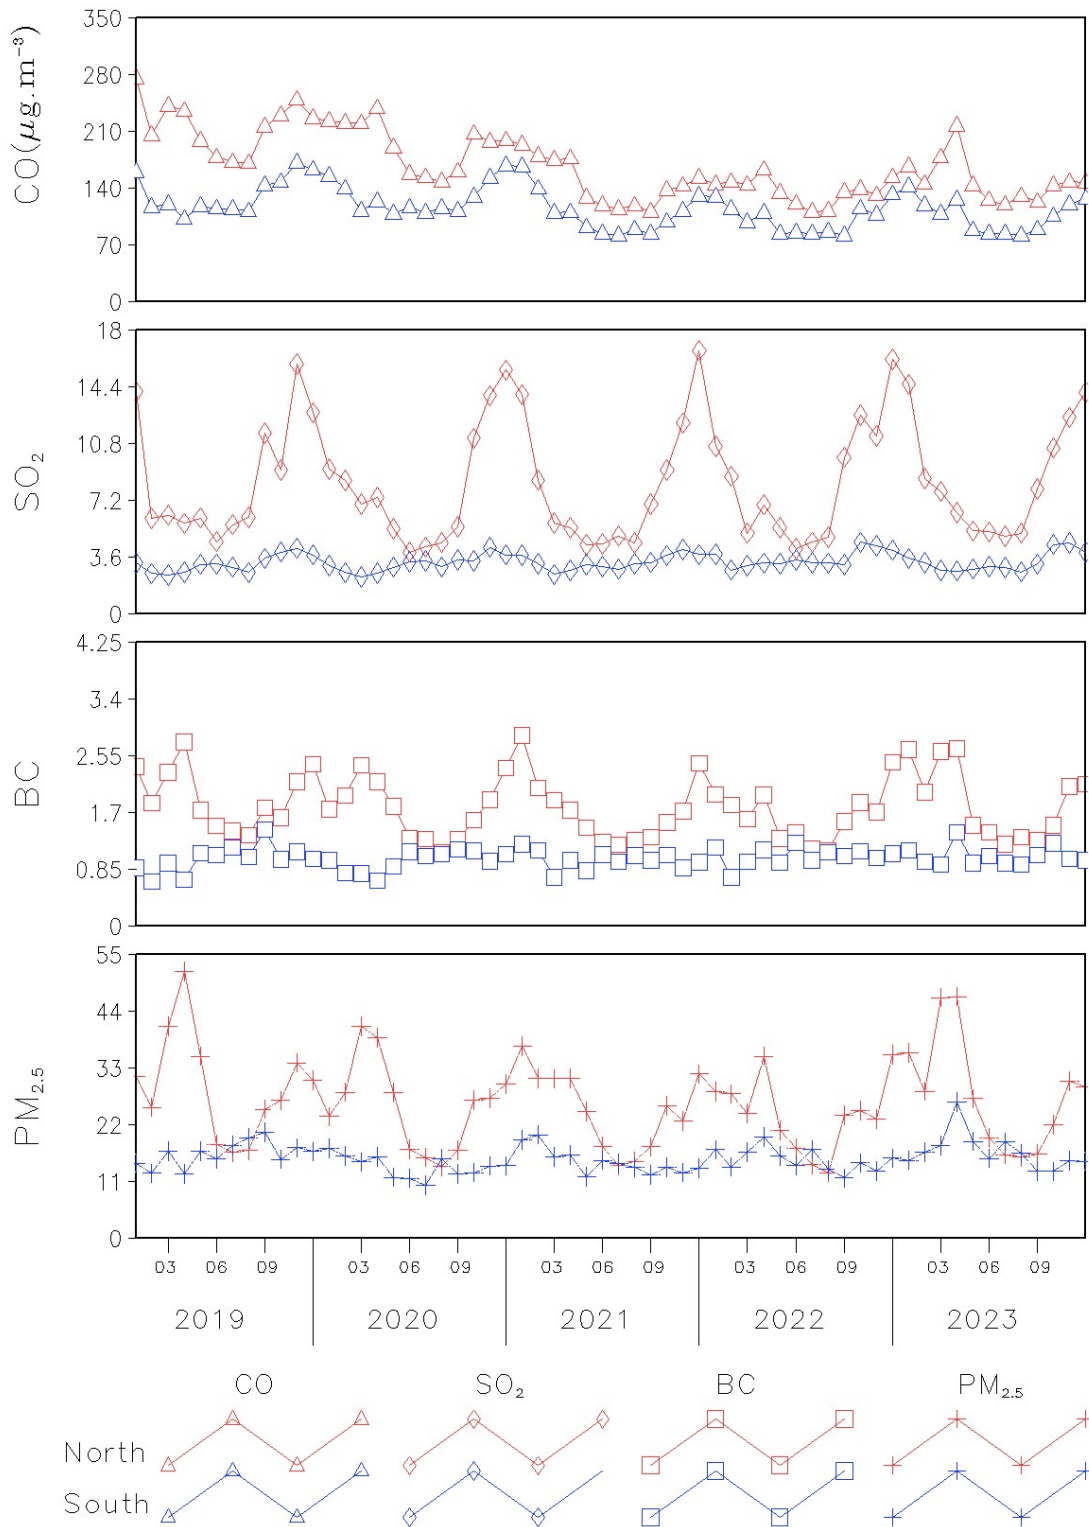

**Figure S1.** Monthly value of pollutants over the period (2019-2023) in North and South regions of Vietnam.

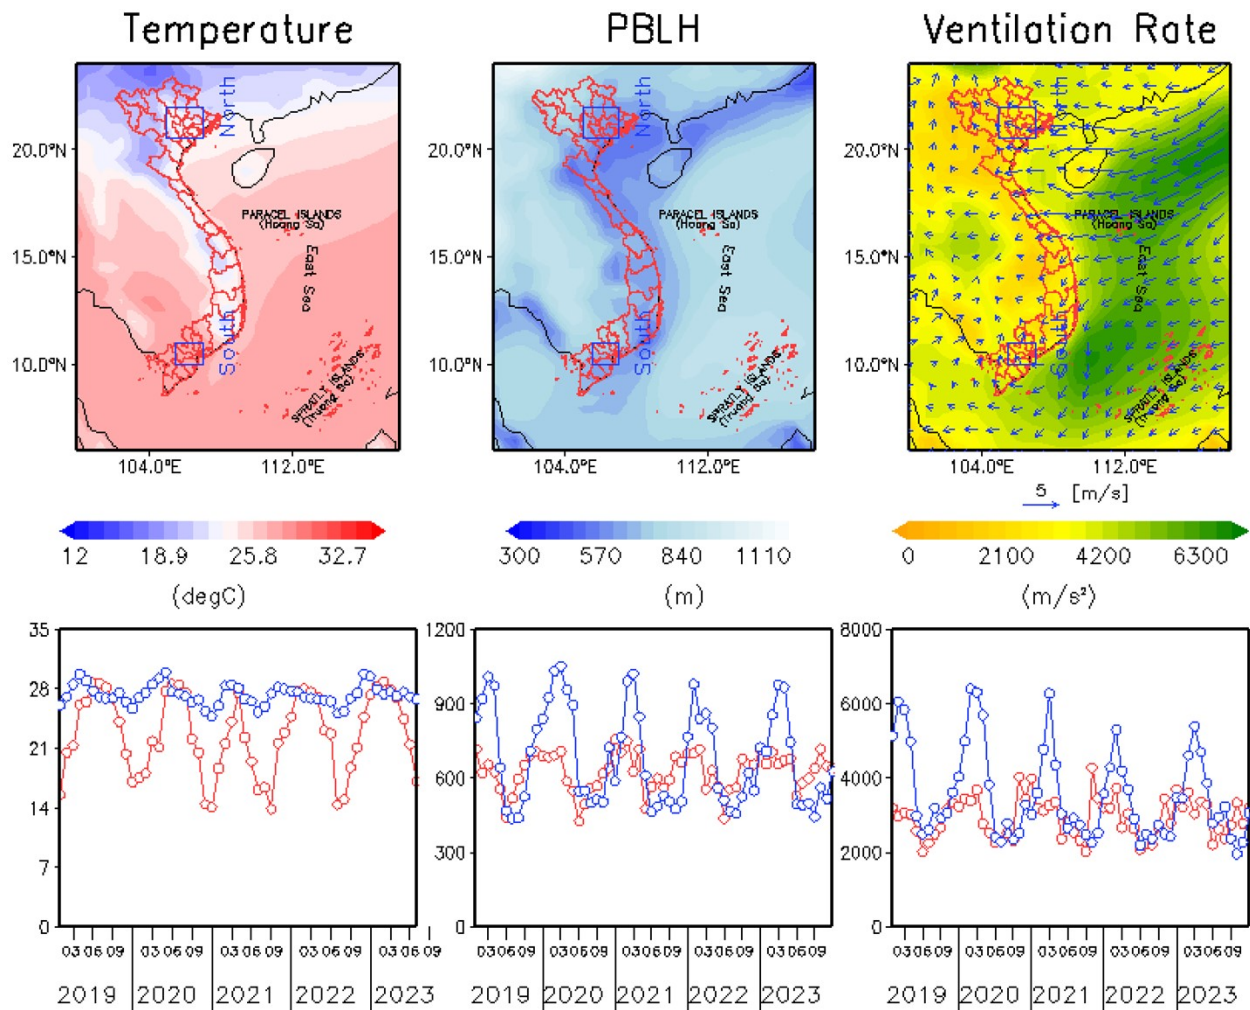

**Figure S2.** Spatial distribution and time series of wind speed, planetary boundary layer height, and ventilation rate in Vietnam and average over two regions of Vietnam over period of 2019-2023.
